# Supplementary material for: Highly efficient core–shell Ag@carbon dot modified TiO2 nanofibers for photocatalytic degradation of organic pollutants and their SERS monitoring
Source: Royal Society of Chemistry journal article supplement (doi:10.1039/d0ra00168f), 2020-01-01
Supplement: d0ra00168f1.pdf [file d0ra00168f1.pdf]

## Supporting Information

### Highly efficient core-shell Ag@carbon dots modified TiO<sub>2</sub> nanofibers for photocatalytic degradation of organic pollutants and their SERS monitoring

*Jing Jin, Wei Song,\* Ning Zhang, Linjia Li, Hao Liu, Bai Yang, Bing Zhao\**

State Key Laboratory of Supramolecular Structure and Materials, Jilin University, Changchun  
130012, P. R. China

Email: weisong@jlu.edu.cn, zhaob@jlu.edu.cn

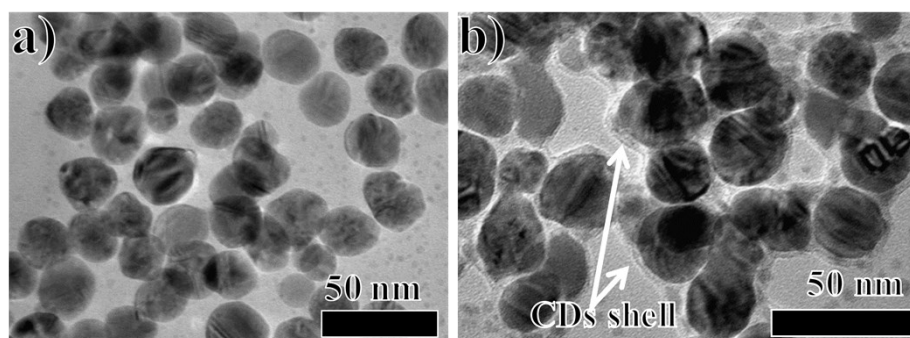

**Fig. S1** (a) HRTEM images of Ag NPs and (b) core-shell structured Ag@CDs NPs with the similar size.

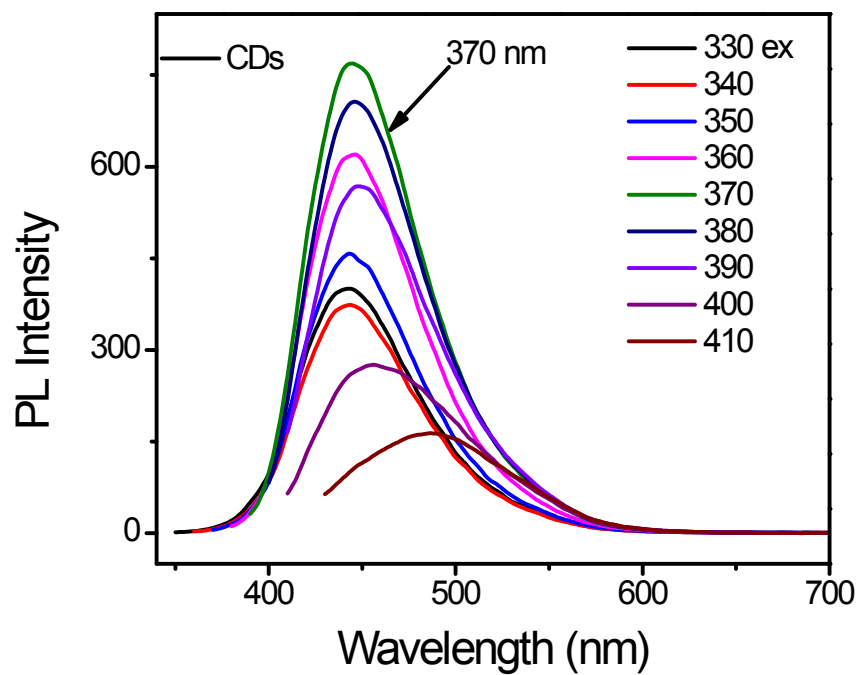

**Fig. S2** Excitation-dependent PL of CDs aqueous solution.

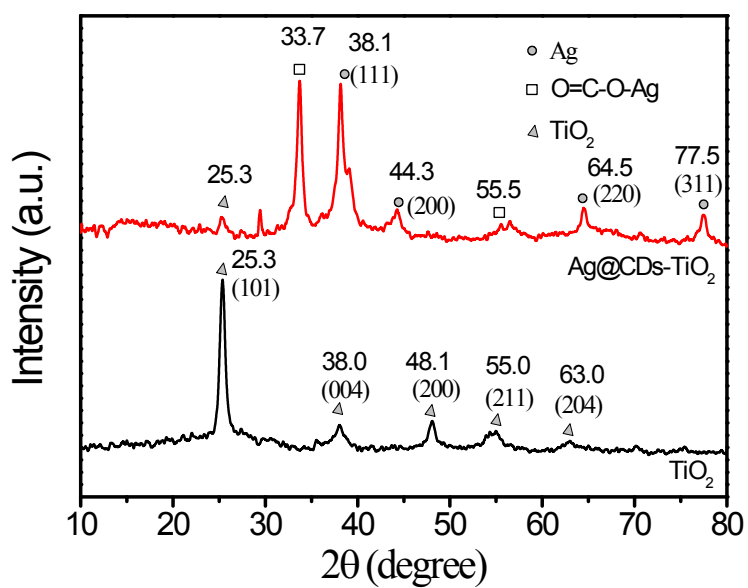

**Fig. S3** XRD patterns of TiO<sub>2</sub> NFs and Ag@CDs-TiO<sub>2</sub> hybrid NFs.

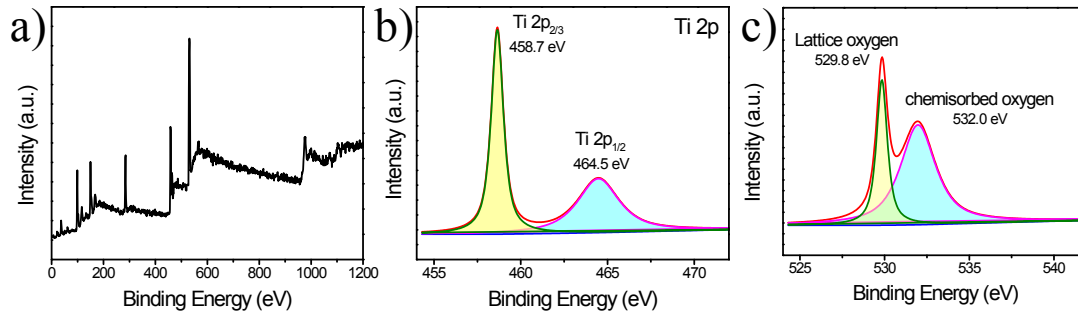

**Fig. S4** XPS spectra of TiO<sub>2</sub> NFs: (a) full-range, (b) Ti 2p, (c) O 1s.

### Method for the calculation of enhancement factor (EF) of the Ag@CDs-TiO<sub>2</sub>

The evaluation of the enhancement factor (EF) of the Ag@CDs-TiO<sub>2</sub> is according to the following equation:<sup>1</sup>

$$EF = (I_{\text{SERS}}/N_{\text{SERS}})/(I_0/N_0)$$

where  $I_{\text{SERS}}$  and  $I_0$  denote the integrated intensity of the equivalent bands ascribed to PATP in SERS and normal Raman spectra, respectively,  $N_{\text{SERS}}$  and  $N_0$  represent the average number of adsorbed molecules in the detection region for the SERS experiments and normal Raman experiments respectively.

$$N_{\text{SERS}} = A c_{\text{surf}} V N_A / A_0,$$

$$N_0 = c_0 A h N_A,$$

where  $A$  is the area of the laser spot (1  $\mu\text{m}$ ),  $c_{\text{surf}}$  is the concentration of the determined PATP molecules,  $c_0$  is the concentration of PATP for the normal Raman measurement,  $N_A$  is the Avogadro constant,  $V$  is the volume of the adsorbed molecules,  $A_0$  is the area of the modified substrate,  $h$  is the effective focused depth which can be calculated based on the confocal feature of the microscope. We suppose that all molecules within the effective focused depth contribute to the whole Raman signal, and neglect the Raman signal from outside of the effective focused depth. The effective focused depth can be calculated to be 19  $\mu\text{m}$ . The SERS spectra and normal Raman were measured under the same laser power, excitation wavenumber, and same acquisition time. Eventually, an EF value of about  $2.6 \times 10^6$  was obtained for the Ag@CDs-TiO<sub>2</sub> substrate, indicating the Ag@CDs-TiO<sub>2</sub> with high sensitivity.

References:

1. W. Song, W. Ji, S. Vantasin, I. Tanabe, B. Zhao, Y. Ozaki, *J. Mater. Chem. A* 2015, **3**, 13556-13562.
